# Supplementary material for: ZFP64 Promotes Gallbladder Cancer Progression through Recruiting HDAC1 to Activate NOTCH1 Signaling Pathway
Source: MDPI journal article supplement (doi:10.3390/cancers15184508), 2023-09-11
Supplement: s1 [file s1]

| Clinicopathological features |           | Univariate Cox |                     |                   | Multivariate Cox |                   |
|------------------------------|-----------|----------------|---------------------|-------------------|------------------|-------------------|
|                              |           | Cases          | Survival<br>(Month) | <i>P</i><br>value | HR<br>(95% CI)   | <i>P</i><br>value |
| Age                          | < 60      | 22             | 22                  | 0.661             |                  |                   |
|                              | ≥ 60      | 28             | 21                  |                   |                  |                   |
| Gender                       | Male      | 20             | 20                  | 0.205             |                  |                   |
|                              | Female    | 30             | 22                  |                   |                  |                   |
| CA19-9 level                 | ≤ 37 U/ml | 31             | 29                  | 0.046             | 1.357            | 0.455             |
|                              | > 37 U/ml | 19             | 19                  |                   | (0.610-3.019)    |                   |
| Tumor size                   | ≤ 3 cm    | 30             | 30                  | 0.030             | 1.131            | 0.781             |
|                              | > 3 cm    | 20             | 17                  |                   | (0.473-2.704)    |                   |
| Hepatic invasion             | No        | 26             | 40                  | <0.001            | 2.650            | 0.106             |
|                              | Yes       | 24             | 17                  |                   | (0.813-8.636)    |                   |
| Lymph node metastasis        | No        | 26             | 40                  | <0.001            | 1.497            | 0.507             |
|                              | Yes       | 24             | 17                  |                   | (0.454-4.940)    |                   |
| Neuro invasion               | No        | 38             | 29                  | <0.001            | 1.546            | 0.490             |
|                              | Yes       | 12             | 13                  |                   | (0.449-5.326)    |                   |
| Vascular invasion            | No        | 45             | 25                  | <0.001            | 2.469            | 0.237             |
|                              | Yes       | 5              | 10                  |                   | (0.552-11.047)   |                   |
| Tumor differentiation        | No        | 29             | 29                  | 0.041             | 1.532            | 0.328             |
|                              | Yes       | 21             | 19                  |                   | (0.652-3.596)    |                   |
|                              | Low       | 25             | 45                  | <0.001            | 3.191            | 0.014             |

|                              |      |    |    |                   |
|------------------------------|------|----|----|-------------------|
| ZFP64<br>expression<br>level | High | 25 | 15 | (1.270-<br>8.019) |
|------------------------------|------|----|----|-------------------|

Table S2. Prognostic factors for disease-free survival by the univariate and multivariate cox proportional hazards regression model.
