# Supplementary material for: ZFP64 Promotes Gallbladder Cancer Progression through Recruiting HDAC1 to Activate NOTCH1 Signaling Pathway
Source: MDPI journal article supplement (doi:10.3390/cancers15184508), 2023-09-11
Supplement: s1 [file s1]

| Clinicopathological features |           | Univariate Cox |                     |                   | Multivariate Cox        |                   |
|------------------------------|-----------|----------------|---------------------|-------------------|-------------------------|-------------------|
|                              |           | Cases          | Survival<br>(Month) | <i>P</i><br>value | HR<br>(95% CI)          | <i>P</i><br>value |
| Age                          | < 60      | 22             | 33                  | 0.559             |                         |                   |
|                              | ≥ 60      | 28             | 25.5                |                   |                         |                   |
| Gender                       | Male      | 20             | 24                  | 0.132             |                         |                   |
|                              | Female    | 30             | 33                  |                   |                         |                   |
| CA19-9 level                 | ≤ 37 U/ml | 31             | 42                  | <0.001            | 3.741<br>(1.661-8.425)  | 0.001             |
|                              | > 37 U/ml | 19             | 19                  |                   |                         |                   |
| Tumor size                   | ≤ 3 cm    | 30             | 37                  | 0.028             | 1.055<br>(0.436-2.549)  | 0.906             |
|                              | > 3 cm    | 20             | 20                  |                   |                         |                   |
| Hepatic invasion             | No        | 26             | 54                  | <0.001            | 2.587<br>(0.730-9.173)  | 0.141             |
|                              | Yes       | 24             | 20                  |                   |                         |                   |
| Lymph node metastasis        | No        | 26             | 54                  | <0.001            | 1.602<br>(0.442-5.813)  | 0.473             |
|                              | Yes       | 24             | 20                  |                   |                         |                   |
| Neuro invasion               | No        | 38             | 33                  | 0.004             | 3.142<br>(0.997-9.906)  | 0.051             |
|                              | Yes       | 12             | 20                  |                   |                         |                   |
| Vascular invasion            | No        | 45             | 33                  | <0.001            | 2.715<br>(0.619-11.919) | 0.186             |
|                              | Yes       | 5              | 13                  |                   |                         |                   |
| Tumor differentiation        | No        | 29             | 36                  | 0.051             | 1.748<br>(0.734-4.163)  | 0.207             |
|                              | Yes       | 21             | 22                  |                   |                         |                   |
|                              | Low       | 25             | 54                  | <0.001            | 2.980                   | 0.031             |

|                           |      |    |    |                   |
|---------------------------|------|----|----|-------------------|
| ZFP64<br>expression level | High | 25 | 20 | (1.105-<br>8.039) |
|---------------------------|------|----|----|-------------------|

Table S1. Prognostic factors for overall survival by the univariate and multivariate cox proportional hazards regression model.
