# Supplementary material for: ZFP64 Promotes Gallbladder Cancer Progression through Recruiting HDAC1 to Activate NOTCH1 Signaling Pathway
Source: MDPI journal article supplement (doi:10.3390/cancers15184508), 2023-09-11
Supplement: s1 [file s1]

| Antibody   | Company        | Cat. No.   |
|------------|----------------|------------|
| Notch1     | Cell Signaling | 3608       |
| NICD       | Cell Signaling | 4147       |
| HES1       | HUABIO         | ET1610-97  |
| HEY1       | Proteintech    | 19929-1-AP |
| NUMB       | HUABIO         | ET1703-02  |
| BAX        | HUABIO         | ET1603-34  |
| BCL-2      | HUABIO         | ER0602     |
| CyclinD1   | Proteintech    | 60186-1-Ig |
| N-cadherin | Proteintech    | 66219-1-Ig |
| E-cadherin | Proteintech    | 60335-1-Ig |
| Vimentin   | Proteintech    | 60330-1-Ig |
| ZFP64      | Proteintech    | 17187-1-AP |
| H3K18lac   | PTMBIO         | PTM-1427RM |
| H4K77ac    | PTMBIO         | PTM-127RM  |
| HDAC1      | Proteintech    | 66085-1-Ig |

Table S3. Summary of primary antibody information used in this article.
