# Supplementary material for: ZFP64 Promotes Gallbladder Cancer Progression through Recruiting HDAC1 to Activate NOTCH1 Signaling Pathway
Source: MDPI journal article supplement (doi:10.3390/cancers15184508), 2023-09-11
Supplement: s1 [file s1]

| Accession | Gene Symbol | Description                                                                                                       | Score Sequest HT:<br>Sequest HT |
|-----------|-------------|-------------------------------------------------------------------------------------------------------------------|---------------------------------|
| Q15149    | PLEC        | Plectin OS=Homo sapiens OX=9606<br>GN=PLEC PE=1 SV=3                                                              | 409.03                          |
| P35579    | MYH9        | Myosin-9 OS=Homo sapiens OX=9606<br>GN=MYH9 PE=1 SV=4                                                             | 111.43                          |
| O00159    | MYO1C       | Unconventional myosin-Ic OS=Homo<br>sapiens OX=9606 GN=MYO1C PE=1<br>SV=4                                         | 39.77                           |
| Q09666    | AHNAK       | Neuroblast differentiation-associated<br>protein AHNAK OS=Homo sapiens<br>OX=9606 GN=AHNAK PE=1 SV=2              | 27.29                           |
| P11142    | HSPA8       | Heat shock cognate 71 kDa protein<br>OS=Homo sapiens OX=9606<br>GN=HSPA8 PE=1 SV=1                                | 32.67                           |
| Q13547    | HDAC1       | Histone deacetylase 1 OS=Homo<br>sapiens OX=9606 GN=HDAC1 PE=1<br>SV=1                                            | 32.47                           |
| P08729    | KRT7        | Keratin, type II cytoskeletal 7<br>OS=Homo sapiens OX=9606 GN=KRT7<br>PE=1 SV=5                                   | 29.08                           |
| O75369    | FLNB        | Filamin-B OS=Homo sapiens OX=9606<br>GN=FLNB PE=1 SV=2                                                            | 24.37                           |
| Q9P0K7    | RAI14       | Ankycorbin OS=Homo sapiens<br>OX=9606 GN=RAI14 PE=1 SV=2                                                          | 28.11                           |
| P21333    | FLNA        | Filamin-A OS=Homo sapiens OX=9606<br>GN=FLNA PE=1 SV=4                                                            | 25.9                            |
| Q6WCQ1    | MPRIP       | Myosin phosphatase Rho-interacting<br>protein OS=Homo sapiens OX=9606<br>GN=MPRIP PE=1 SV=3                       | 26.87                           |
| P02545    | LMNA        | Prelamin-A/C OS=Homo sapiens<br>OX=9606 GN=LMNA PE=1 SV=1                                                         | 25.53                           |
| P07355    | ANXA2       | Annexin A2 OS=Homo sapiens<br>OX=9606 GN=ANXA2 PE=1 SV=2                                                          | 22.83                           |
| Q9BZF9    | UACA        | Uveal autoantigen with coiled-coil<br>domains and ankyrin repeats<br>OS=Homo sapiens OX=9606<br>GN=UACA PE=1 SV=2 | 29.54                           |
| P08727    | KRT19       | Keratin, type I cytoskeletal 19<br>OS=Homo sapiens OX=9606<br>GN=KRT19 PE=1 SV=4                                  | 21.18                           |
| P13645    | KRT10       | Keratin, type I cytoskeletal 10<br>OS=Homo sapiens OX=9606<br>GN=KRT10 PE=1 SV=6                                  | 19.15                           |

|        |        |                                                                                   |       |
|--------|--------|-----------------------------------------------------------------------------------|-------|
| Q8WWI1 | LMO7   | LIM domain only protein 7 OS=Homo sapiens OX=9606 GN=LMO7 PE=1 SV=3               | 18.3  |
| P14618 | PKM    | Pyruvate kinase PKM OS=Homo sapiens OX=9606 GN=PKM PE=1 SV=4                      | 19.09 |
| Q9UHB6 | LIMA1  | LIM domain and actin-binding protein 1 OS=Homo sapiens OX=9606 GN=LIMA1 PE=1 SV=1 | 17.02 |
| P11940 | PABPC1 | Polyadenylate-binding protein 1 OS=Homo sapiens OX=9606 GN=PABPC1 PE=1 SV=2       | 6.94  |

Table S4. Top twenty ZFP64 pull-down proteins analyzed by mass spectrum.
